# Supplementary material
Source: publisher site journal article supplement (https://www.dovepress.com/get_supplementary_file.php?f=297131.docx)
Supplement: Supplementary file 1 [file get_supplementary_file.php]

**Supplementary Figure 1**

**
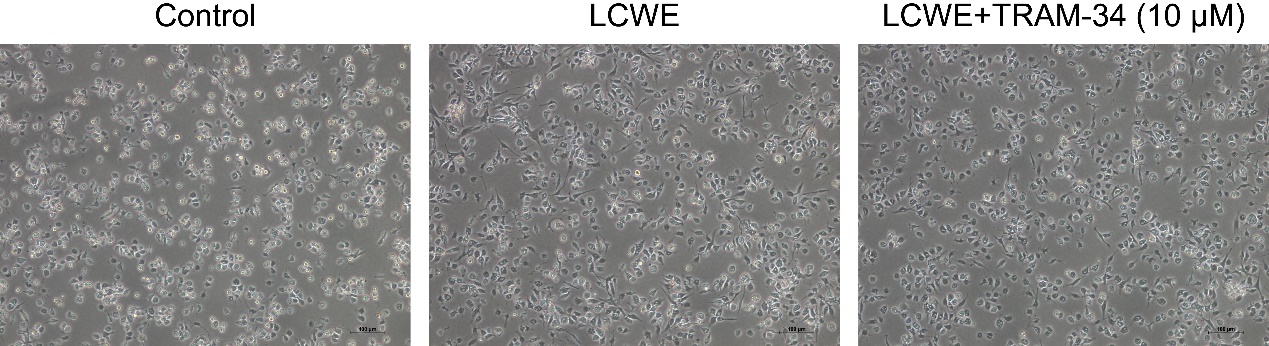
**

**Supplementary Figure 1. Effects of KCa3.1 inhibition by TRAM-34 on LCWE-induced activation in mouse primary peritoneal macrophages.** Mouse primary peritoneal macrophages were stimulated by LCWE (1 μg/mL) for 12 h in the presence or absence of TRAM-34 (10 μM). The representative pictures of mouse were showed for the phenotypic changes of mouse primary peritoneal macrophages. Magnification = 100×. Scale bar = 100 µm
